# Supplementary material
Source: HighWire-hosted journal article supplement (https://jnm.snmjournals.org/highwire/filestream/94381/field_highwire_adjunct_files/0/102608_Supplemental_Data.pdf)
Supplement: 102608_Supplemental_Data.pdf [file 102608_Supplemental_Data.pdf]

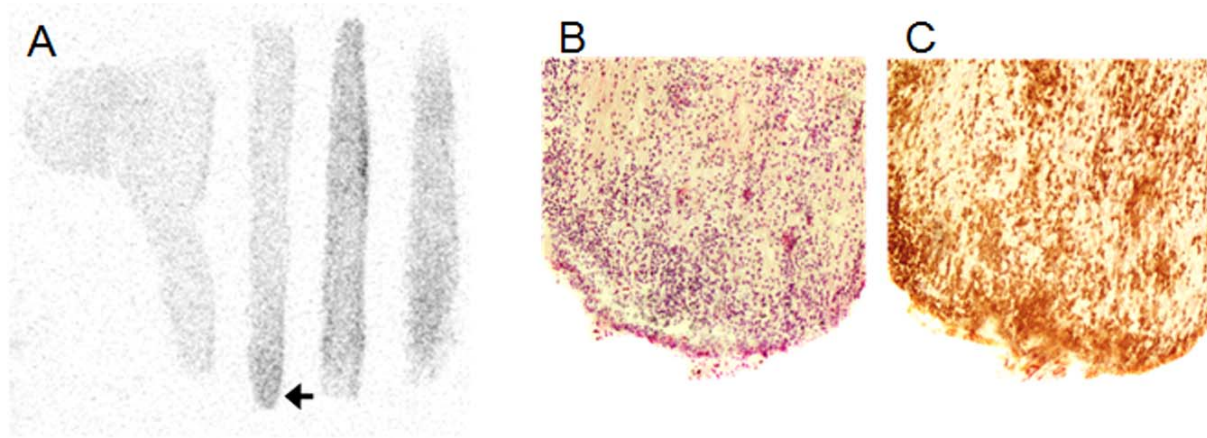

**Supplemental Figure 1:** [ $^{18}\text{F}$ ]FLT ex vivo autoradiography of an EAE diseased rat. Immediately after the PET scan brainstem, cerebellum and spinal cord were cut into 12 $\mu\text{m}$  sagittal sections. The same sections which had been used for autoradiography (1A) were stained with HE (1B) to assess inflammation. In adjacent sections immunohistochemistry of CD68 positive cells (1C) was performed. Increased [ $^{18}\text{F}$ ]FLT uptake was observed in severely affected tissue. The lesion of which histology is shown is marked with an arrow. Original magnification of histological sections x 10.

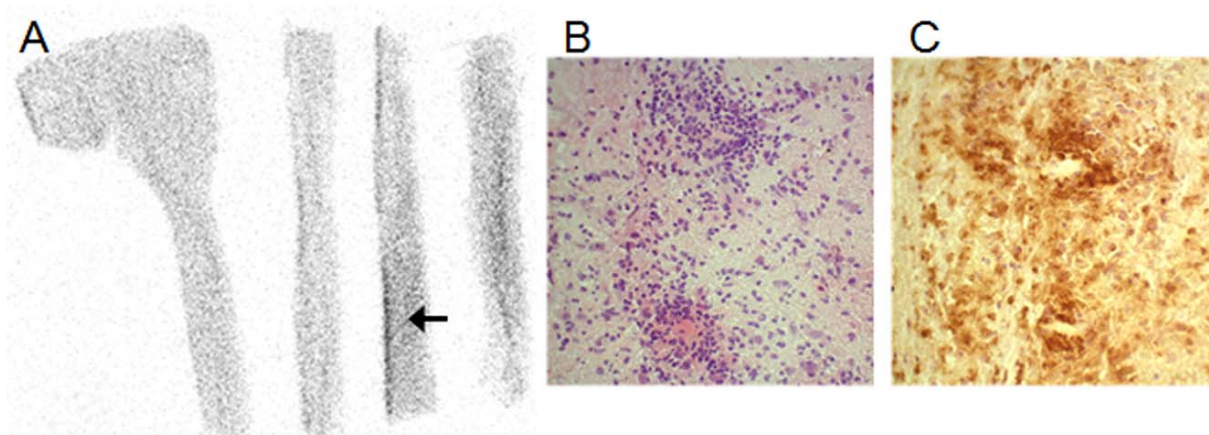

**Supplemental Figure 2:** [ $^{18}\text{F}$ ]FET ex vivo autoradiography of an EAE diseased rat. Immediately after the PET scan brainstem, cerebellum and spinal cord were cut into 12 $\mu\text{m}$  sagittal sections. The same sections which had been used for autoradiography (2A) were stained with HE (2B) to assess inflammation. In adjacent sections immunohistochemistry of CD68 positive cells (2C) was performed. Increased [ $^{18}\text{F}$ ]FET uptake was observed in severely affected tissue. The lesion of which histology is shown is marked with an arrow. Original magnification of histological sections x 10.

**Supplemental Table 1:** Multiple pairwise comparisons were performed for each category of histologically determined cellular infiltrates and z-scores of all image modalities (autoradiography, PET, T1 after contrast, and T2). Post-hoc pairwise tests of all possible group contrasts were corrected by the Holm-Bonferroni method. To warrant a global alpha error level of 5%, only adjusted two-sided p-values less than 0.05 were considered to indicate statistical significance.

HC= healthy control, No = no histologically determined cellular infiltrate, mild = mild histologically determined cellular infiltrate, moderate = moderate histologically determined cellular infiltrate, severe = severe histologically determined cellular infiltrate.

| comparison |        | Holm-Bonferroni adjusted p-values multiple group comparisons |       |                   |       |
|------------|--------|--------------------------------------------------------------|-------|-------------------|-------|
| group1     | group2 | Autoradiography                                              | PET   | T1 after contrast | T2    |
| No         | HC     | >0.99                                                        | >0.99 | >0.99             | >0.99 |
| Mild       | HC     | >0.99                                                        | >0.99 | >0.99             | >0.99 |
| Mild       | No     | >0.99                                                        | >0.99 | >0.99             | >0.99 |
| Moderate   | HC     | >0.99                                                        | >0.99 | >0.99             | >0.99 |
| Moderate   | No     | >0.99                                                        | >0.99 | >0.99             | >0.99 |
| Moderate   | Mild   | >0.99                                                        | >0.99 | >0.99             | >0.99 |
| Severe     | HC     | 0,100                                                        | >0.99 | missing           | >0.99 |
| Severe     | No     | 0,013                                                        | >0.99 | missing           | >0.99 |
| Severe     | Mild   | 0,0499                                                       | >0.99 | missing           | >0.99 |

|        |          |       |       |         |       |
|--------|----------|-------|-------|---------|-------|
| Severe | Moderate | 0,601 | >0.99 | missing | >0.99 |
|--------|----------|-------|-------|---------|-------|

| comparison |          | unadjusted p-values multiple group comparisons |       |                   |       |
|------------|----------|------------------------------------------------|-------|-------------------|-------|
| group1     | group2   | Autoradiography                                | PET   | T1 after contrast | T2    |
| No         | HC       | 0,388                                          | 0,106 | 0,329             | 0,099 |
| Mild       | HC       | 0,885                                          | 0,242 | 0,243             | 0,337 |
| Mild       | No       | 0,369                                          | 0,424 | 0,747             | 0,294 |
| Moderate   | HC       | 0,486                                          | 0,997 | 0,254             | 0,236 |
| Moderate   | No       | 0,147                                          | 0,079 | 0,728             | 0,743 |
| Moderate   | Mild     | 0,374                                          | 0,177 | 0,875             | 0,673 |
| Severe     | HC       | 0,00294                                        | 0,750 | missing           | 0,859 |
| Severe     | No       | 0,00035                                        | 0,080 | missing           | 0,308 |
| Severe     | Mild     | 0,00143                                        | 0,156 | missing           | 0,596 |
| Severe     | Moderate | 0,01820                                        | 0,706 | missing           | 0,388 |
